# Supplementary material
Source: MDPI journal article supplement (https://www.mdpi.com/2073-4433/8/10/202)
Supplement: s1 [file s1]

Table S1: Altitudinal gradient

Data of the altitudinal gradient in absolute numbers (INP<sub>-8</sub> m<sup>-3</sup>).

| Date     | INP <sub>-8</sub> (m <sup>-3</sup> ) |          |             |
|----------|--------------------------------------|----------|-------------|
|          | Payerne                              | Chaumont | Jungfrauoch |
| 14.05.16 | 4.0                                  | 2.1      | 0.0         |
| 15.05.16 | 2.3                                  | 0.8      | 0.1         |
| 16.05.16 | 0.6                                  | 0.3      | 0.1         |
| 17.05.16 | 0.4                                  | 0.6      | 0.0         |
| 11.06.16 | 36.7                                 | 44.0     | 1.2         |
| 12.06.16 | 43.1                                 | 6.0      | 0.3         |
| 13.06.16 | 10.7                                 | 19.2     | 0.2         |
| 14.06.16 | 82.8                                 | 14.8     | 1.1         |
| 28.06.16 | 1.0                                  | 1.1      | 0.6         |
| 29.06.16 | 1.6                                  | 1.9      | 0.0         |
| 27.07.16 | 12.4                                 | 4.3      | 2.9         |
| 28.07.16 | 15.9                                 | 4.8      | 0.9         |
| 29.07.16 | 2.1                                  | 0.9      | 0.7         |
| 30.07.16 | 2.3                                  | 1.0      | 0.7         |
| 31.07.16 | 114.3                                | 52.1     | 1.5         |
| 08.08.16 | 1.8                                  | 0.9      | 0.4         |
| 09.08.16 | 1.5                                  | 1.6      | 0.5         |
| 10.08.16 | 4.3                                  | 1.6      | 0.2         |
| 11.08.16 | 3.2                                  | 1.1      | 0.2         |
| 18.08.16 | 7.5                                  | 7.3      | 1.7         |
| 19.08.16 | 3.1                                  | 6.0      | 1.4         |
| 20.08.16 | 5.0                                  | 7.7      | 0.8         |
| 21.08.16 | 9.2                                  | 3.1      | 2.5         |
| 04.09.16 | 2.0                                  | 4.5      | 0.7         |
| 17.09.16 | 12.8                                 | 11.0     | 0.5         |
| 18.09.16 | 12.8                                 | 15.8     | 0.0         |
