# Supplementary material
Source: MDPI journal article supplement (https://www.mdpi.com/2073-4433/8/10/202)
Supplement: s1 [file s1]

Table S2: Time series Novosibirsk

Data of INP<sub>8</sub> measurements in Novosibirsk, including the mean temperature and the total sample volume (ambient conditions), as recorded by the PM<sub>10</sub> sampler (BGI PQ100).

| Sampling period (local time) |                | Temperature | Volume | INP <sub>8</sub>   |
|------------------------------|----------------|-------------|--------|--------------------|
| start                        | end            | (°C)        | (m3)   | (m <sup>-3</sup> ) |
| 29.2.16 13:09                | 29.2.16 17:44  | -2.7        | 4.9    | 0.1                |
| 3.3.16 15:05                 | 4.3.16 16:15   | -6.5        | 25.9   | 0.1                |
| 9.3.16 11:10                 | 9.3.16 17:52   | 5.1         | 7.1    | 2.4                |
| 14.3.16 11:35                | 14.3.16 18:40  | 1.5         | 7.3    | 0.9                |
| 17.3.16 8:40                 | 17.3.16 19:02  | 3.2         | 16.7   | 0.8                |
| 21.3.16 9:30                 | 21.3.16 18:13  | 15.4        | 8.7    | 1.2                |
| 24.3.16 7:00                 | 24.3.16 19:09  | 7.7         | 12.6   | 1.1                |
| 28.3.16 8:35                 | 28.3.16 19:27  | 14.6        | 10.8   | 2.6                |
| 31.3.16 8:10                 | 1.4.16 8:22    | 7.4         | 25.2   | 2.6                |
| 4.4.16 8:38                  | 5.4.16 8:44    | 6.6         | 25.3   | 1.2                |
| 7.4.16 9:05                  | 8.4.16 9:00    | 7.2         | 23.3   | 2.2                |
| 11.4.16 8:30                 | 12.4.16 9:00   | 4.8         | 25.8   | 0.8                |
| 14.4.16 9:30                 | 15.4.16 9:50   | 8.6         | 25.4   | 6.2                |
| 18.4.16 8:09                 | 19.4.16 10:46  | 15.7        | 27.1   | 6.8                |
| 21.4.16 8:30                 | 22.4.16 10:26  | 19.9        | 25.8   | 9.5                |
| 25.4.16 8:00                 | 26.4.16 9:40   | 13.8        | 25.9   | 9.9                |
| 28.4.16 10:00                | 29.4.16 10:18  | 12.3        | 24.6   | 7.2                |
| 4.5.16 8:30                  | 5.5.16 10:15   | 16.2        | 26.1   | 18.7               |
| 10.5.16 8:00                 | 10.5.16 17:18  | 16.3        | 9.3    | 4.2                |
| 13.5.16 8:40                 | 15.5.16 17:36  | 17.0        | 58.3   | 7.8                |
| 16.5.16 8:55                 | 16.5.16 17:12  | 17.6        | 8.1    | 2.5                |
| 19.5.16 9:35                 | 19.5.16 17:29  | 24.3        | 7.7    | 14.6               |
| 23.5.16 10:00                | 23.5.16 17:08  | 40.7        | 7.0    | 45.3               |
| 26.5.16 9:50                 | 26.5.16 17:23  | 34.8        | 7.4    | 37.4               |
| 30.5.16 8:00                 | 30.5.16 17:22  | 25.4        | 9.0    | 15.7               |
| 2.6.16 8:30                  | 2.6.16 17:20   | 20.4        | 8.4    | 21.9               |
| 8.6.16 8:30                  | 8.6.16 18:30   | 30.2        | 9.6    | 19.2               |
| 15.6.16 8:00                 | 15.6.16 17:14  | 24.8        | 8.8    | 17.9               |
| 22.6.16 9:00                 | 22.6.16 16:50  | 29.3        | 7.3    | 5.4                |
| 29.6.16 8:00                 | 29.6.16 17:32  | 29.1        | 6.2    | 12.0               |
| 6.7.16 8:30                  | 7.7.16 7:30    | 27.4        | 22.1   | 9.6                |
| 13.7.16 8:00                 | 13.7.16 18:30  | 39.9        | 6.8    | 19.4               |
| 20.7.16 8:10                 | 20.7.16 17:50  | 29.3        | 8.3    | 6.5                |
| 27.7.16 8:30                 | 27.7.16 18:20  | 23.0        | 8.3    | 11.4               |
| 3.8.16 8:00                  | 3.8.16 18:00   | 25.8        | 9.2    | 1.5                |
| 10.8.16 8:30                 | 10.8.16 20:07  | 22.9        | 12.0   | 13.1               |
| 17.8.16 9:00                 | 17.8.16 18:17  | 27.9        | 7.7    | 2.7                |
| 24.8.16 8:30                 | 24.8.16 17:09  | 22.6        | 9.2    | 4.2                |
| 31.8.16 8:00                 | 31.8.16 17:10  | 13.9        | 9.3    | 7.5                |
| 7.9.16 8:00                  | 7.9.16 17:40   | 26.0        | 9.9    | 36.2               |
| 14.9.16 10:00                | 14.9.16 18:40  | 18.7        | 6.7    | 88.1               |
| 21.9.16 8:00                 | 21.9.16 16:25  | 19.5        | 9.2    | 21.8               |
| 28.9.16 8:00                 | 28.9.16 16:45  | 14.6        | 7.3    | 25.1               |
| 5.10.16 8:00                 | 5.10.16 18:35  | 4.9         | 12.1   | 43.8               |
| 12.10.16 10:00               | 12.10.16 19:12 | 2.4         | 10.2   | 9.4                |
| 19.10.16 8:30                | 19.10.16 17:30 | -3.0        | 10.2   | 29.6               |
| 26.10.16 8:30                | 26.10.16 17:30 | -4.5        | 12.7   | 1.9                |
| 2.11.16 14:00                | 3.11.16 14:35  | -0.4        | 25.0   | 0.8                |
| 9.11.16 8:30                 | 10.11.16 9:55  | -6.7        | 28.8   | 1.7                |
| 23.11.16 10:30               | 24.11.16 10:30 | -8.4        | 25.3   | 2.1                |
| 7.12.16 10:30                | 8.12.16 10:40  | -7.9        | 20.5   | 3.2                |
| 21.12.16 10:30               | 22.12.16 11:30 | -20.9       | 25.3   | 0.4                |
| 11.1.17 9:00                 | 12.1.17 10:00  | -11.3       | 28.2   | 1.6                |
| 25.1.17 10:00                | 26.1.17 9:57   | -9.1        | 27.6   | 1.4                |
| 8.2.17 14:00                 | 9.2.17 14:05   | -8.8        | 26.0   | 3.8                |
| 23.2.17 9:00                 | 24.2.17 9:00   | -3.5        | 26.9   | 1.6                |
